# Supplementary material
Source: PubMed Central journal article supplement (PMC3517916)
Supplement: NIHMS400917-supplement-Supplementary_Table_1.pdf [file NIHMS400917-supplement-Supplementary_Table_1.pdf]

**SUPPLEMENTARY TABLES**

**Supplementary Table 1**

| <b>CD1 strain</b>                   |          | <b>Follicle counts</b> |                |                  |
|-------------------------------------|----------|------------------------|----------------|------------------|
| <b>PN5 <i>in vivo</i> treatment</b> | <b>n</b> | <b>Primordial</b>      | <b>Primary</b> | <b>Secondary</b> |
| <b>PN10 Vehicle</b>                 | 3        | 879                    | 125            | 75               |
| <b>PN10 Imatinib</b>                | 3        | 921                    | 108            | 81               |
| <b>PN10 Cisplatin</b>               | 3        | 0                      | 3              | 79               |
| <b>PN10 Imatinib+Cisplatin</b>      | 3        | 0                      | 0              | 74               |
| <b>PN10 Imatinib pre-Cisplatin</b>  | 3        | 0                      | 3              | 81               |
| <b>PN10 Cisplatin pre-Imatinib</b>  | 3        | 0                      | 0              | 99               |
| <b>Total follicles scored</b>       |          | 1800                   | 239            | 489              |
|                                     |          |                        |                |                  |
| <b>C57BL/6 strain</b>               |          | <b>Follicle counts</b> |                |                  |
| <b>PN5 <i>in vivo</i> treatment</b> | <b>n</b> | <b>Primordial</b>      | <b>Primary</b> | <b>Secondary</b> |
| <b>PN10 Vehicle</b>                 | 5        | 1006                   | 231            | 129              |
| <b>PN10 Imatinib</b>                | 5        | 662                    | 149            | 89               |
| <b>PN10 Cisplatin</b>               | 4        | 87                     | 116            | 71               |
| <b>PN10 Imatinib pre-Cisplatin</b>  | 6        | 47                     | 104            | 81               |
| <b>Total follicles scored</b>       |          | 1802                   | 600            | 370              |
|                                     |          |                        |                |                  |

## **Supplementary Table 1**

**Follicle quantification in mice following treatment with vehicle, cisplatin, imatinib or cisplatin plus imatinib.** Primordial follicle counts were performed on CD1 mice that had been treated with vehicle (PBS), imatinib (7.5 mg/kg i.p.), cisplatin (5 mg/kg) with imatinib and cisplatin administered together, with imatinib administered 2 h prior to cisplatin or with cisplatin administered prior to imatinib. Primordial follicle counts were performed on C57BL/6 mice that had been pre-treated *in vivo* at PN5 with imatinib (7.5 mg/kg i.p.) or vehicle (PBS) for 2 h and then treated with cisplatin (5 mg/kg) or vehicle and analyzed at PN10. Left or right ovaries were fixed in Bouin's fixative and hematoxylin plus eosin stained serial sections prepared. Total healthy primordial, primary or secondary follicles (each of which contain an oocyte) were counted in 5 sections selected at equal intervals from each ovary. Counts are cumulative scores, n = number of mice.
