# Supplementary material
Source: PubMed Central journal article supplement (PMC3517916)
Supplement: NIHMS400917-supplement-Supplementary_Table_2.pdf [file NIHMS400917-supplement-Supplementary_Table_2.pdf]

**Supplementary Table 2**

| <b>PN5 <i>in vivo</i> treatment</b> | <b>n</b> | <b>Primordial<br/>Follicles</b> | <b>Primary<br/>Follicles</b> | <b>Secondary/<br/>Antral<br/>Follicles</b> |
|-------------------------------------|----------|---------------------------------|------------------------------|--------------------------------------------|
| <b>PN49 Vehicle</b>                 | 3        | 129                             | 30                           | 38                                         |
| <b>PN49 Imatinib</b>                | 3        | 155                             | 51                           | 50                                         |
| <b>PN49 Cisplatin</b>               | 3        | 30                              | 22                           | 21                                         |
| <b>PN49 Imatinib+Cisplatin</b>      | 3        | 7                               | 4                            | 8                                          |
| <b>Total</b>                        |          | 321                             | 107                          | 117                                        |

**Supplementary Table 2**

**Follicle quantification at PN49 in C57BL/6 mice that had been treated at PN7 with vehicle, cisplatin, imatinib or cisplatin plus imatinib.** Quantification of primordial follicles in wt mice that had been pre-treated at PN7 with imatinib (7.5 mg/kg i.p.) or vehicle (PBS) for 2 h and then treated with cisplatin (5 mg/kg) or vehicle and analyzed at PN49. Left or right ovaries were fixed in Bouin's fixative, and hematoxylin plus eosin stained serial sections prepared. Total healthy primordial, primary or secondary follicles (each of which contain an oocyte) were counted in 5 sections selected at equal intervals from each ovary. Counts represent cumulative scores, n = number of mice.
