# Supplementary material
Source: PubMed Central journal article supplement (PMC3517916)
Supplement: NIHMS400917-supplement-Supplementary_Table_3.pdf [file NIHMS400917-supplement-Supplementary_Table_3.pdf]

**Supplementary Table 3**

| <b>9-11 months of age</b>    |                        |                | <b>Follicles containing oocytes</b> |                |                              |
|------------------------------|------------------------|----------------|-------------------------------------|----------------|------------------------------|
| <b>(age in days)</b>         | <b>Sections scored</b> | <b>Litters</b> | <b>Primordial</b>                   | <b>Primary</b> | <b>Secondary/<br/>Antral</b> |
| <b>Vehicle #1</b>            | 5                      | 8              | 0                                   | 1              | 1                            |
| <b>Imatinib #1</b>           | 5                      | 7              | 4                                   | 4              | 4                            |
| <b>Imatinib #2</b>           | 5                      | 7              | 5                                   | 4              | 4                            |
| <b>Cisplatin #1</b>          | 5                      | 7              | 1                                   | 3              | 8                            |
| <b>Imatinib+Cisplatin #1</b> | 5                      | 7              | 0                                   | 2              | 1                            |
| <b>Imatinib+Cisplatin #2</b> | 5                      | 8              | 0                                   | 0              | 0                            |

| <b>Upon cessation of fertility</b> |                        |                | <b>Follicles containing oocytes</b> |                |                              |
|------------------------------------|------------------------|----------------|-------------------------------------|----------------|------------------------------|
| <b>(age in days)</b>               | <b>Sections scored</b> | <b>Litters</b> | <b>Primordial</b>                   | <b>Primary</b> | <b>Secondary/<br/>Antral</b> |
| <b>Cisplatin #1</b>                | 4                      | 1              | 0                                   | 0              | 0                            |
| <b>Cisplatin #2</b>                | 4                      | 1              | 0                                   | 0              | 0                            |
| <b>Cisplatin #3</b>                | 4                      | 3              | 0                                   | 0              | 0                            |
| <b>Imatinib+Cisplatin #1</b>       | 4                      | 4              | 0                                   | 0              | 0                            |
| <b>Imatinib+Cisplatin #2</b>       | 4                      | 3              | 0                                   | 0              | 0                            |
| <b>Imatinib+Cisplatin #3</b>       | 4                      | 2              | 0                                   | 0              | 0                            |

**Supplementary Table 3**

**Quantification of follicles in individual C57BL/6 mice at 9-11 months of age and upon cessation of fertility following *in vivo* treatment at PN5 or PN7 with vehicle, cisplatin, imatinib or imatinib plus cisplatin. C57BL/6 female pups were pre-treated at**

PN5 or PN7 with imatinib (7.5 mg/kg i.p.) or vehicle (PBS) for 2 h and then treated with cisplatin (5 mg/kg) or vehicle and allowed to mature to 9-11 months (completing at least 6 breeding rounds), whereupon mice were harvested for histologic analysis of ovaries. Upon cessation of fertility (defined as failure to become pregnant by twelve weeks following date of delivery of last litter), ovaries were harvested for histologic analysis to confirm the absence of viable ovarian follicles. Left or right ovaries were fixed in Bouin's fixative, and hematoxylin plus eosin stained serial sections prepared. Total healthy primordial, primary or secondary follicles (each of which contain an oocyte) were counted in 4-5 sections selected at equal intervals from each ovary. Counts represent cumulative scores.
