# Supplementary material
Source: PubMed Central journal article supplement (PMC3517916)
Supplement: NIHMS400917-supplement-Supplementary_Table_4.pdf [file NIHMS400917-supplement-Supplementary_Table_4.pdf]

**Supplementary Table 4**

| <b>C57BL/6 strain</b>                |          | <b>Follicle counts</b> |                |                  |
|--------------------------------------|----------|------------------------|----------------|------------------|
| <b>PN5 <i>in vitro</i> treatment</b> | <b>n</b> | <b>Primordial</b>      | <b>Primary</b> | <b>Secondary</b> |
| <b>0 h Vehicle</b>                   | 9        | 1082                   | 293            | 12               |
| <b>24 h Vehicle</b>                  | 6        | 660                    | 176            | 3                |
| <b>48 h Vehicle</b>                  | 9        | 1175                   | 218            | 22               |
| <b>24 h Imatinib</b>                 | 5        | 471                    | 114            | 4                |
| <b>48 h Imatinib</b>                 | 8        | 877                    | 200            | 0                |
| <b>24 h Cisplatin</b>                | 4        | 29                     | 62             | 2                |
| <b>48 h Cisplatin</b>                | 5        | 0                      | 40             | 2                |
| <b>24 h Imatinib pre-Cisplatin</b>   | 5        | 3                      | 57             | 0                |
| <b>48 h Imatinib pre-Cisplatin</b>   | 4        | 0                      | 1              | 6                |
| <b>Total</b>                         |          | 4297                   | 1161           | 51               |
|                                      |          |                        |                |                  |

**Supplementary Table 4**

**Follicle quantification in ovaries from C57BL/6 mice following *in vitro* treatment at PN5 with vehicle, cisplatin, imatinib or imatinib pre-cisplatin.** Ovaries were harvested at PN5, cultured for 2 h in the presence of imatinib (10  $\mu$ M) or vehicle (mouse tonicity PBS) before being treated with cisplatin (20  $\mu$ M) or vehicle, then cultured for an additional 24 or 48 h prior to fixing and follicle enumeration. Ovaries were fixed in Bouin's fixative and hematoxylin plus eosin stained serial sections prepared. Total

healthy primordial, primary or secondary follicles (each of which contain an oocyte) were counted in 5 sections selected at equal intervals from each ovary. Counts represent cumulative scores, n = number of mice.
