# Supplementary material
Source: PubMed Central journal article supplement (PMC3517916)
Supplement: NIHMS400917-supplement-Supplementary_Table_6.pdf [file NIHMS400917-supplement-Supplementary_Table_6.pdf]

Supplementary Table 6

| Mean±SD                 | Vehicle    | Imatinib  | Cisplatin | Imatinib+Cisplatin     |       |
|-------------------------|------------|-----------|-----------|------------------------|-------|
| <b>Breeding round 1</b> | 6.9±2.4    | 6.3±2.1   | 5.4±1.9   | 5.1±2.0                |       |
| <b>Breeding round 2</b> | 8.4±2.5*   | 7.8±2.6   | 5.4±2.5   | 5.7±2.0 <sup>##</sup>  |       |
| <b>Breeding round 3</b> | 7.3±2.6*** | 6.7±2.7** | 6.5±2.5   | 7.3±2.9 <sup>###</sup> |       |
| <b>Breeding round 4</b> | 7.6±2.8    | 7.3±2.5   | 5.9±2.3   | 7.0±2.9                |       |
| <b>Breeding round 5</b> | 6.9±2.5    | 5.9±3.0   | 5.6±3.0   | 6.6±2.6                |       |
| <b>Breeding round 6</b> | 4.8±3.4    | 6.6±1.9   | 4.6±2.4   | 4.9±1.5                |       |
|                         |            |           |           |                        |       |
| n=number of litters     | PBS        | Imatinib  | Cisplatin | Imatinib+Cisplatin     |       |
| <b>Breeding round 1</b> | 19         | 24        | 29        | 28                     |       |
| <b>Breeding round 2</b> | 19         | 24        | 30        | 26                     |       |
| <b>Breeding round 3</b> | 17         | 23        | 24        | 22                     |       |
| <b>Breeding round 4</b> | 17         | 21        | 17        | 17                     |       |
| <b>Breeding round 5</b> | 7          | 18        | 8         | 12                     |       |
| <b>Breeding round 6</b> | 5          | 11        | 5         | 7                      | Total |
| <b>Total</b>            | 84         | 121       | 113       | 112                    | 430   |

## Supplementary Table 6

### **Prior treatment with imatinib does not impact on cisplatin-induced effects on litter**

**size.** The average number of pups per litter and the number of litters are shown for each breeding round of C57BL/6 mice, for each treatment group. Results represent Mean  $\pm$  Standard Deviation (SD). \*  $p < 0.05$ , \*\*  $p < 0.01$ , \*\*\*  $p < 0.001$  for comparison with treatment with cisplatin. All other comparisons versus cisplatin treatment NS, including all imatinib+cisplatin results. ##  $p < 0.01$ , ###  $p < 0.001$  for comparison of imatinib+cisplatin versus PBS. All other comparisons with vehicle were NS. NS – non-significant  $p > 0.05$ .
