# Supplementary material
Source: PubMed Central journal article supplement (PMC3517916)

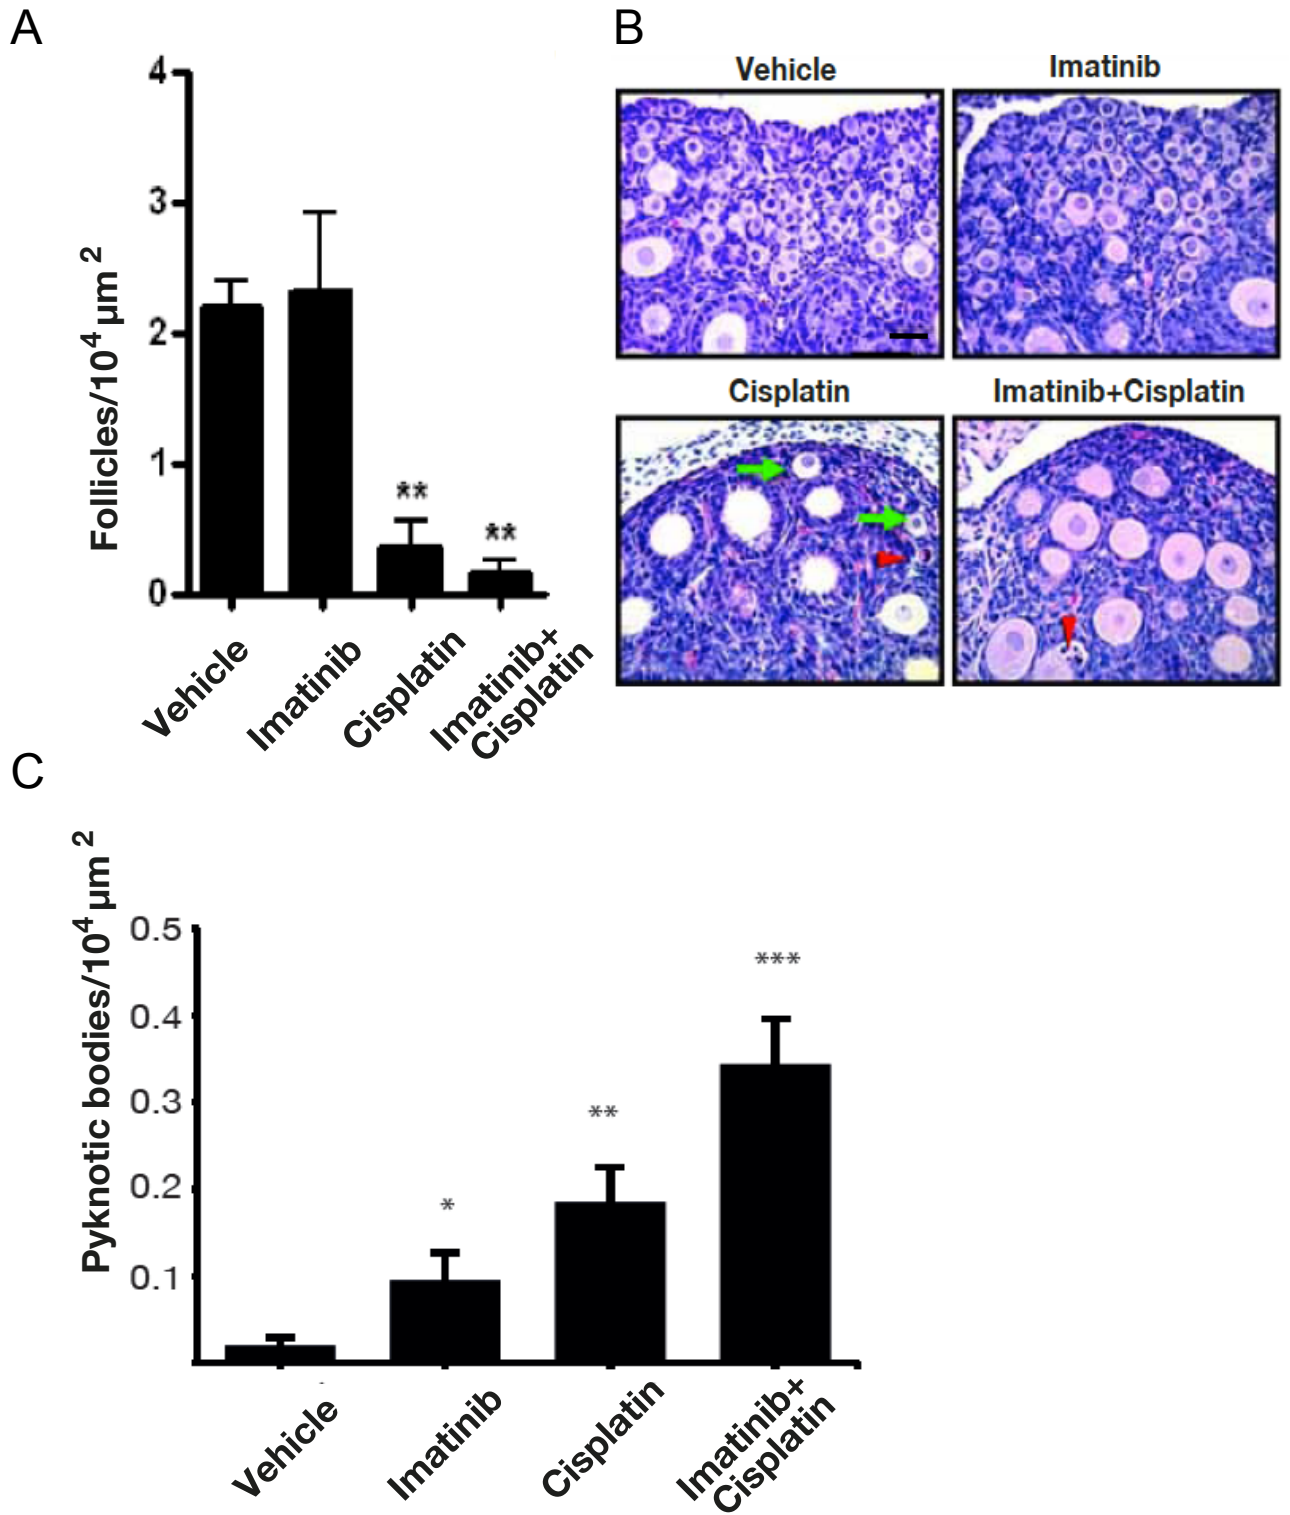

Kerr et al Supplementary Fig. 1

Supplement: NIHMS400917-supplement-Supplementary_Fig__1.pdf [file NIHMS400917-supplement-Supplementary_Fig__1.pdf]

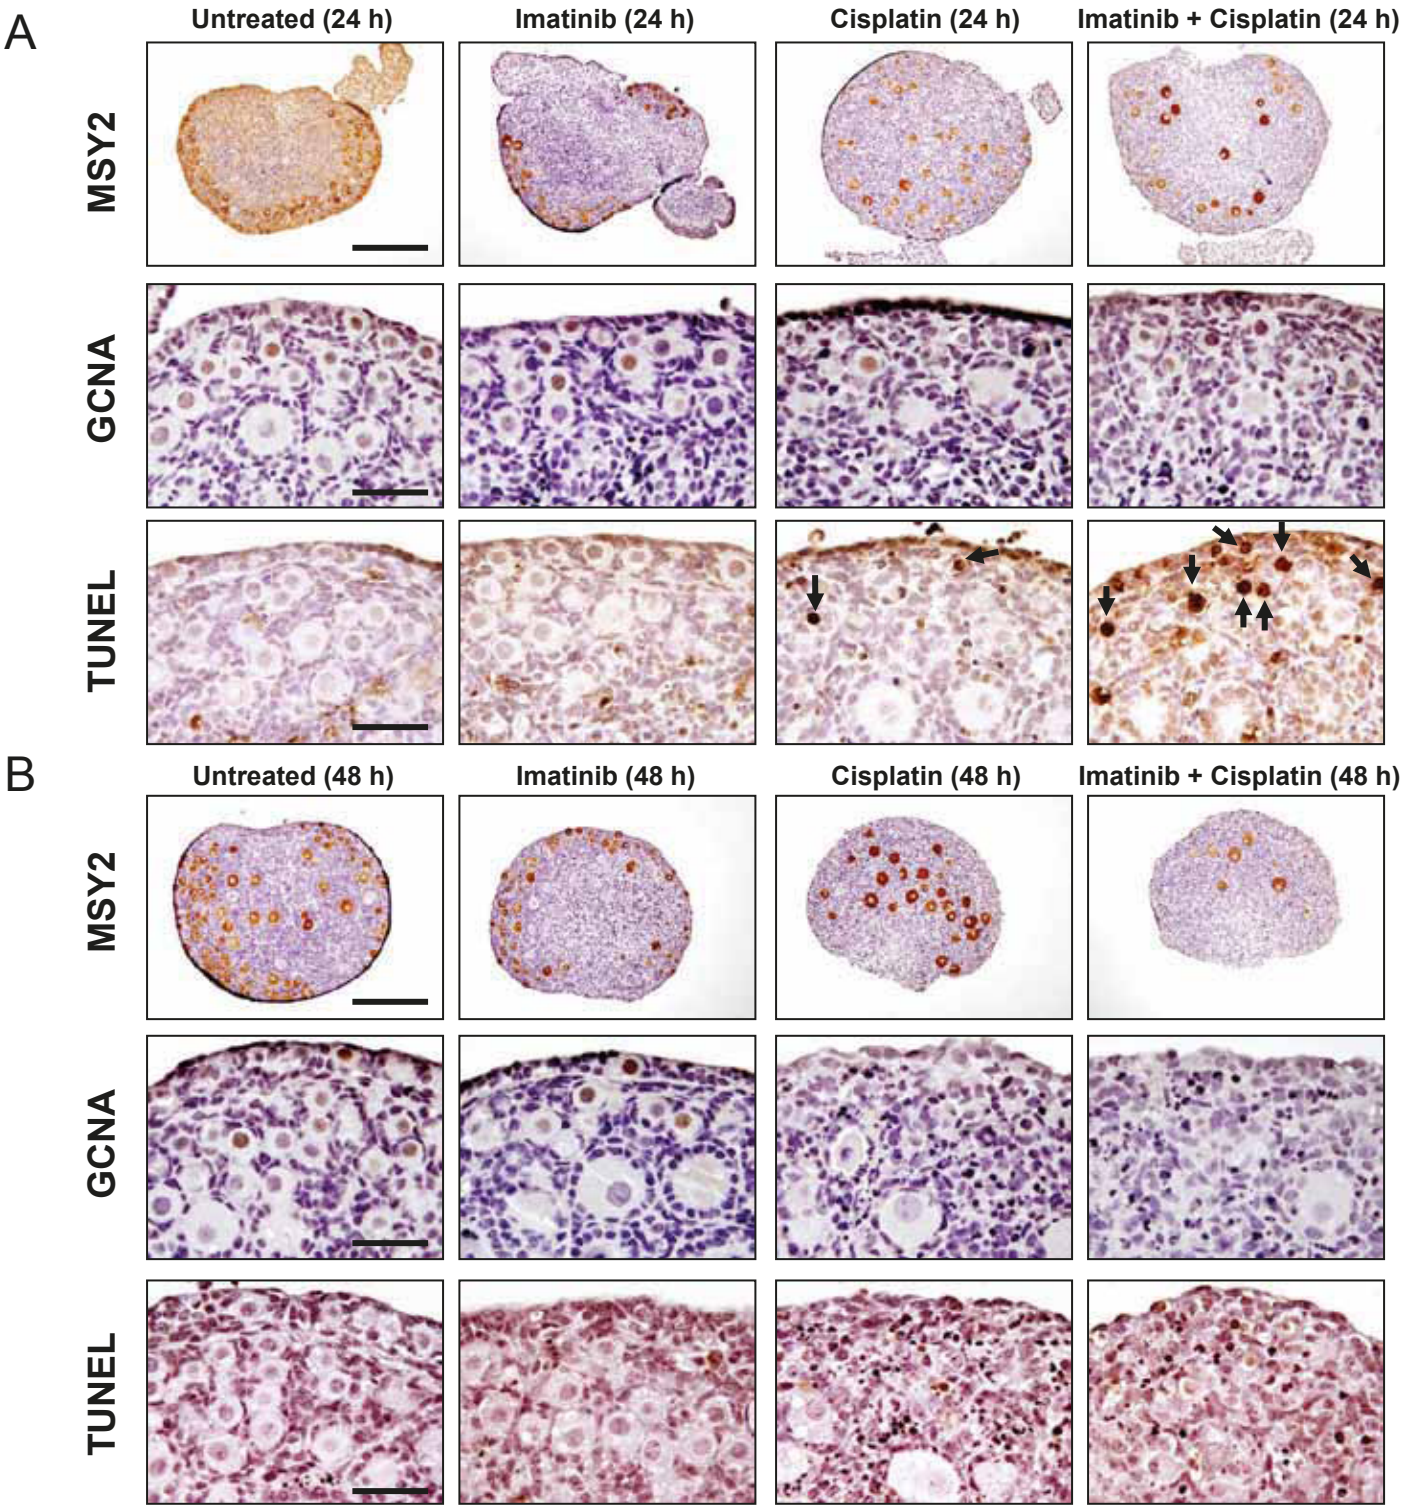

Kerr et al Supplementary Fig. 2

Supplement: NIHMS400917-supplement-Supplementary_Fig__2.pdf [file NIHMS400917-supplement-Supplementary_Fig__2.pdf]

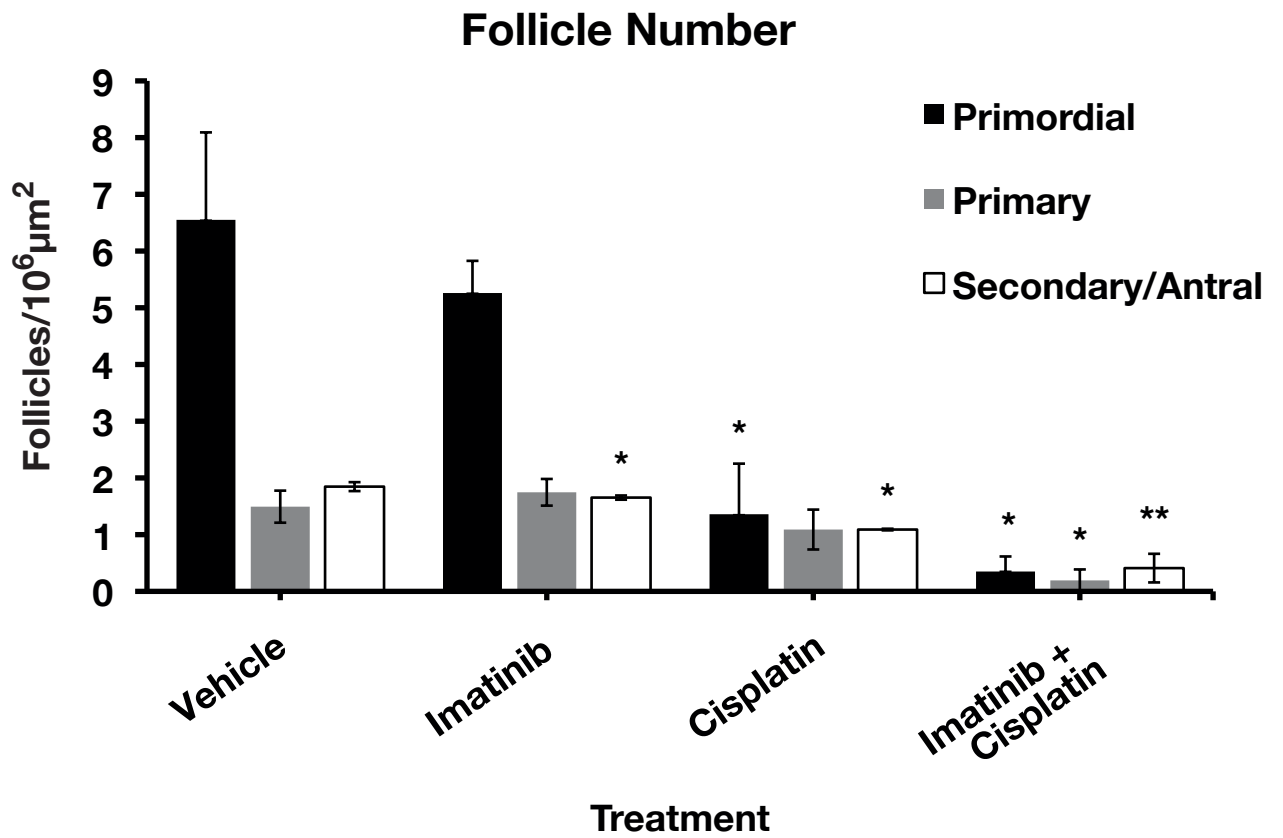

Kerr et al Supplementary Fig. 3

Supplement: NIHMS400917-supplement-Supplementary_Fig__3.pdf [file NIHMS400917-supplement-Supplementary_Fig__3.pdf]

**A**

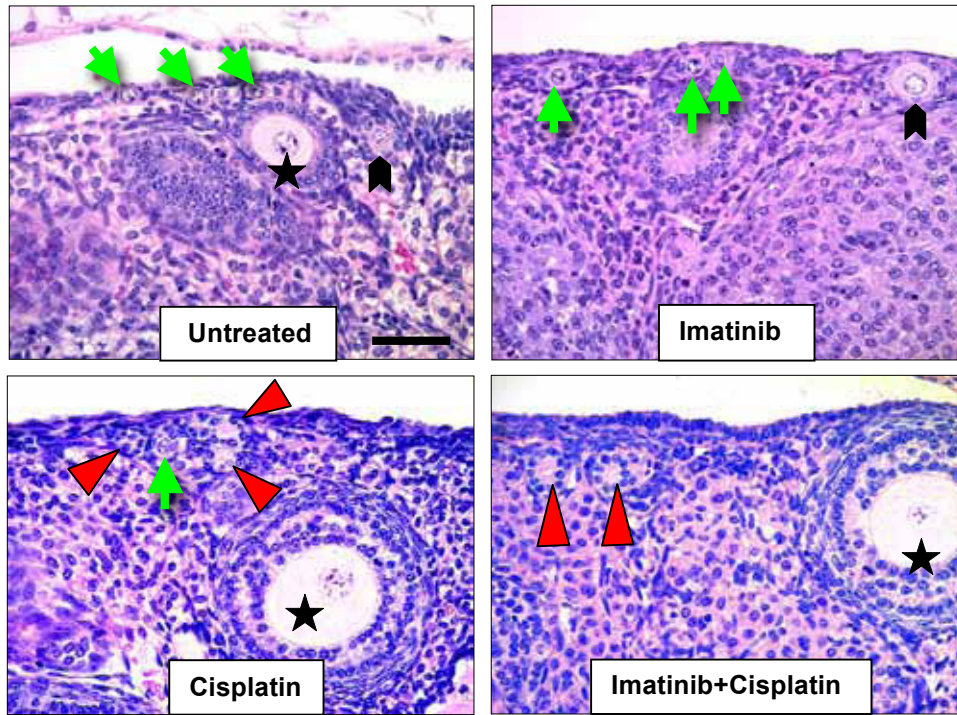

**B**

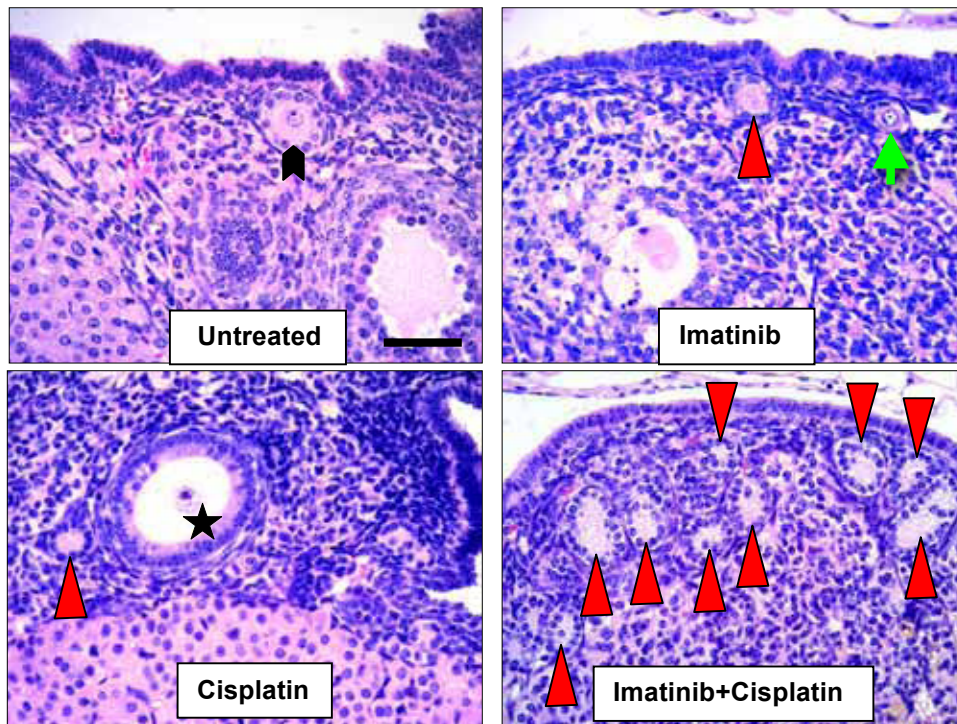

**C**

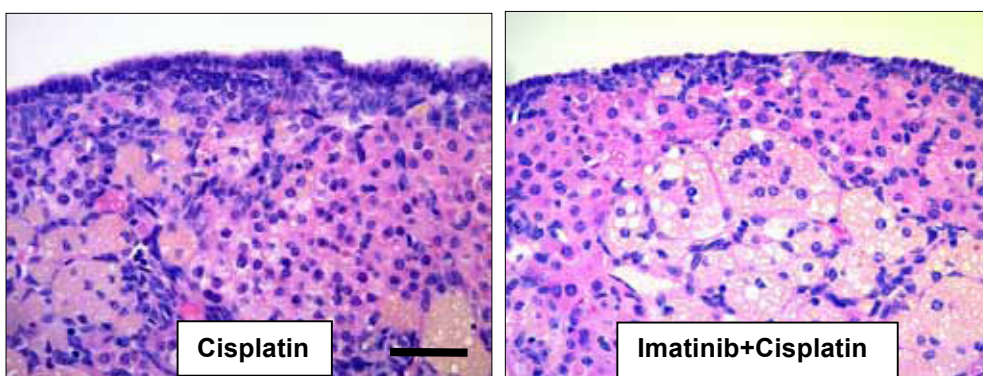

Supplement: NIHMS400917-supplement-Supplementary_Fig__4.pdf [file NIHMS400917-supplement-Supplementary_Fig__4.pdf]

A

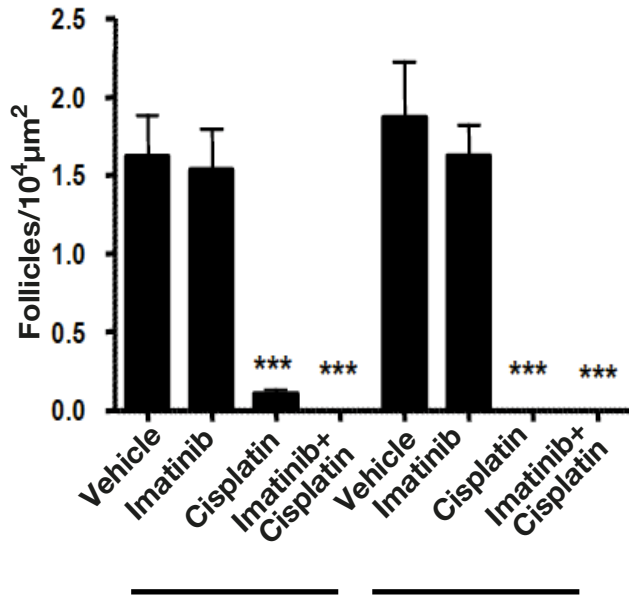

B

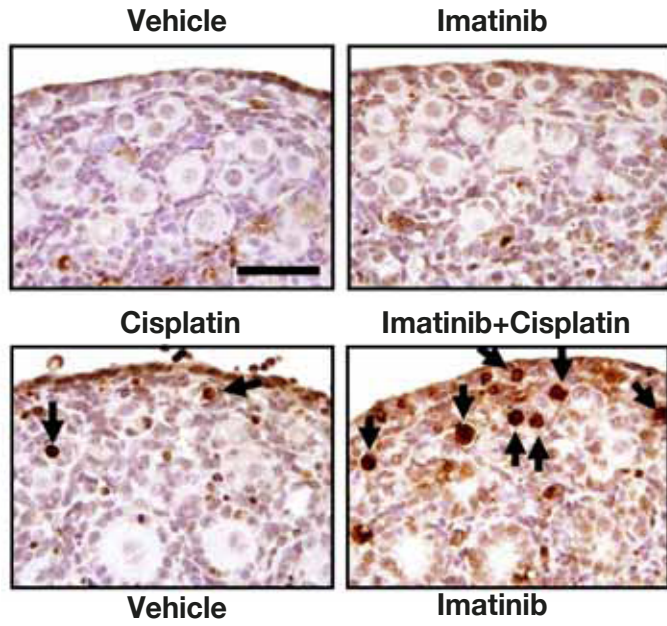

C

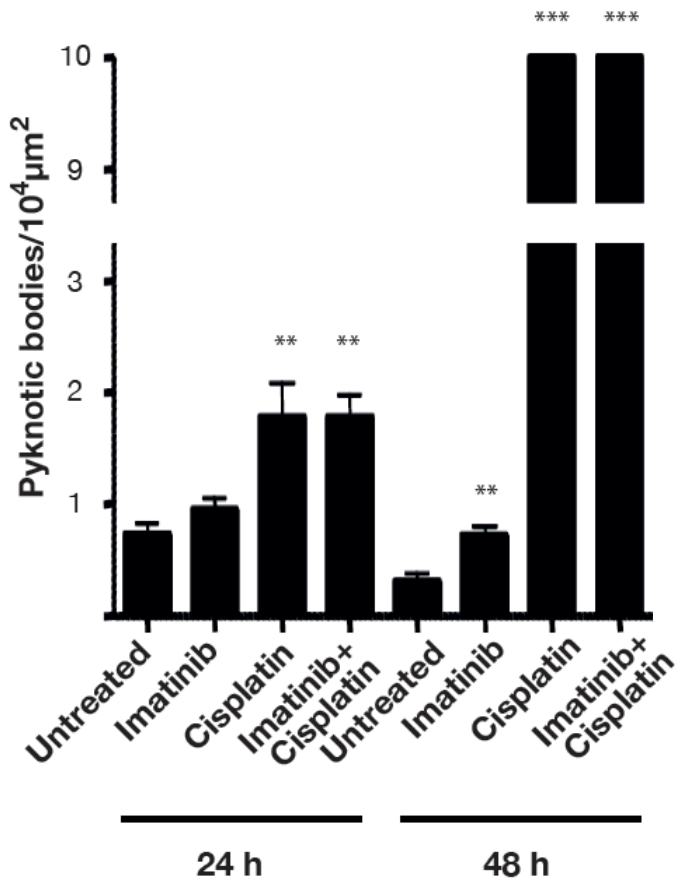

Supplement: NIHMS400917-supplement-Supplementary_Fig__5.pdf [file NIHMS400917-supplement-Supplementary_Fig__5.pdf]

A

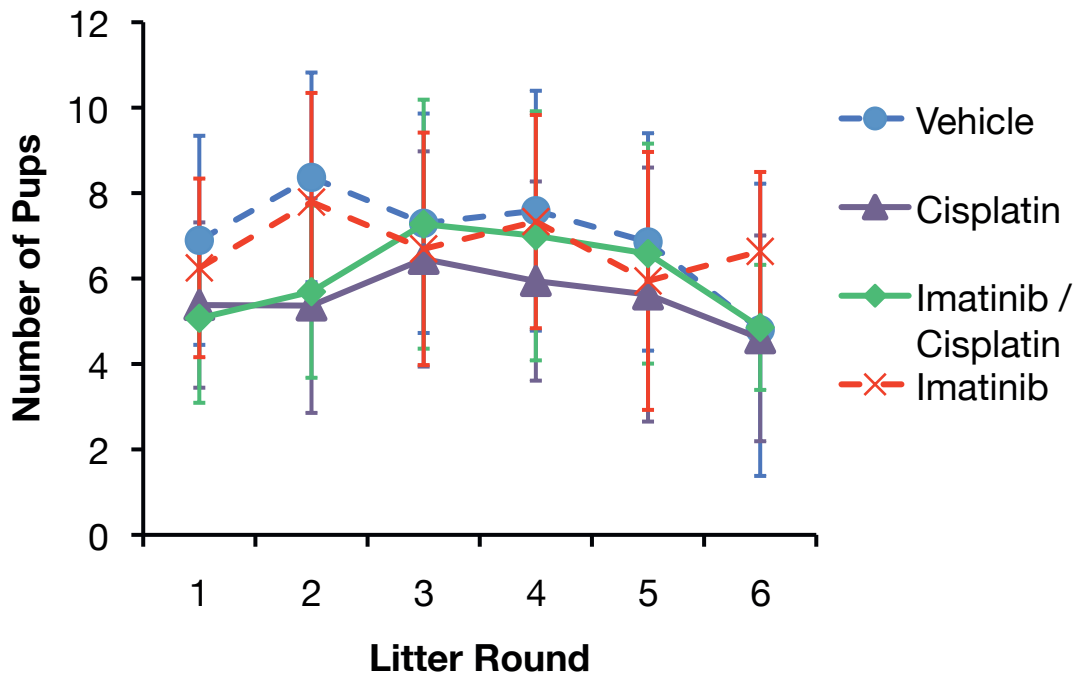

B

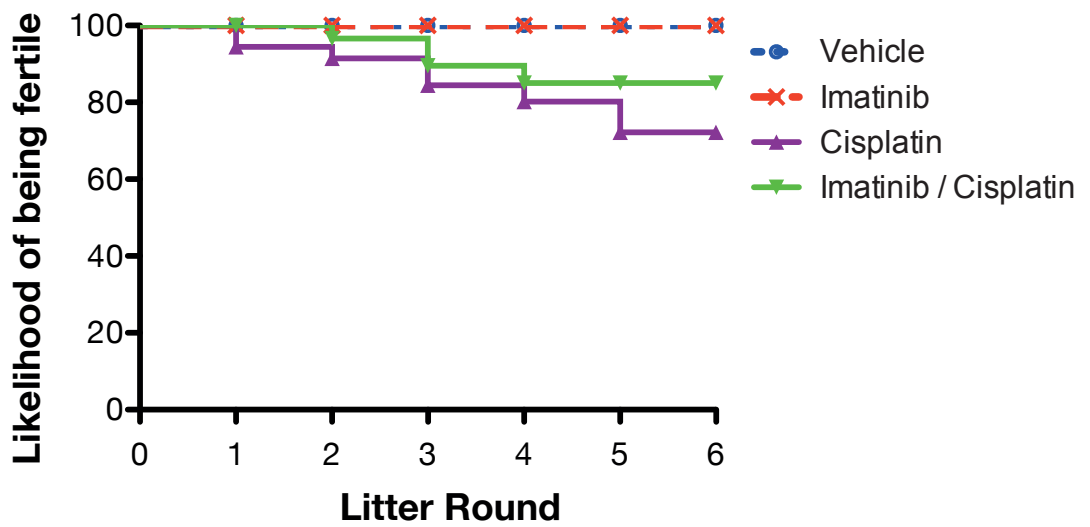

Kerr et al Supplementary Fig. 6

Supplement: NIHMS400917-supplement-Supplementary_Fig__6.pdf [file NIHMS400917-supplement-Supplementary_Fig__6.pdf]
